# Supplementary material
Source: Springer Nature journal article supplement (https://www.springermedizin.de/resource/supplementary/12931_2013_1372_MOESM2_ESM.pdf/9426110)

**Enrollment**

Subjects enrolled  
(N=3,670)

**Follow-Up**

Participants who underwent  
follow-up CT and follow-up  
pulmonary function testing  
(N= 2, 220)

Participants who underwent  
follow-up CT and baseline  
pulmonary function testing  
(N= 1,450)

**Analysis**

Participants included  
in analysis (N= 3,670)

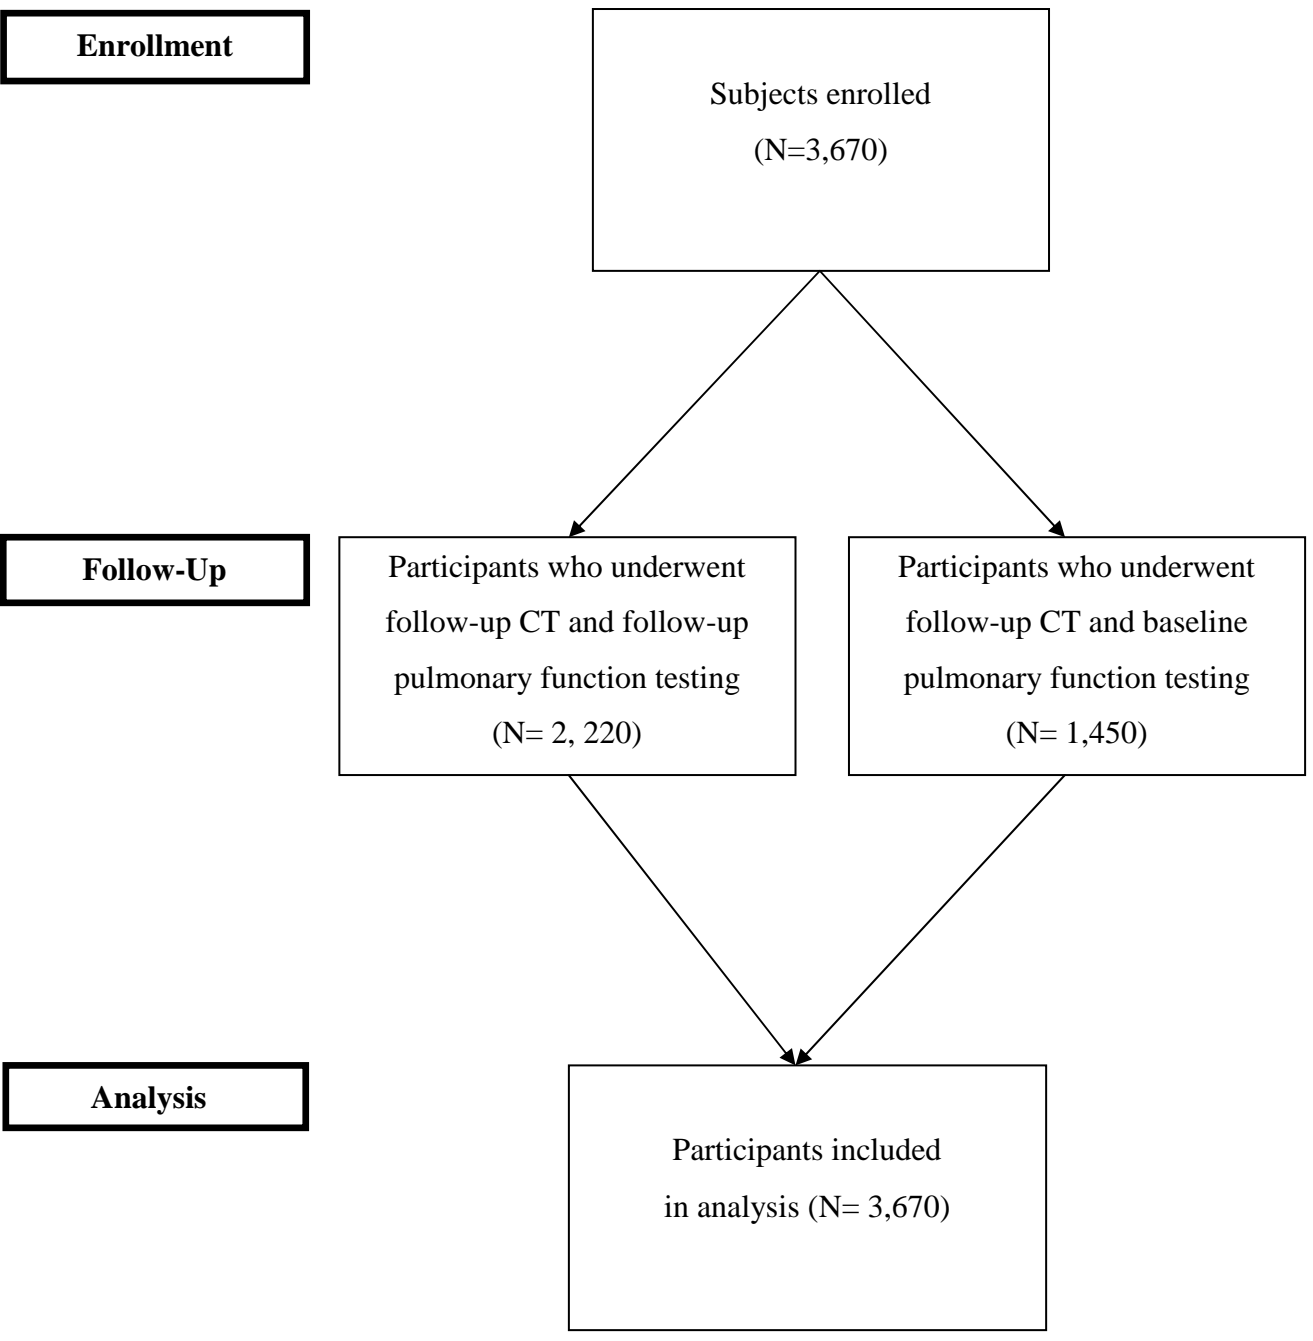

Supplement: MOESM2 [file 9426110]
